# Supplementary material for: Exploring the Core Microbiota of Four Different Traditional Fermented Beverages from the Colombian Andes
Source: MDPI journal article supplement (doi:10.3390/fermentation8120733), 2022-12-13
Supplement: s1 [file s1]

Supplementary tables

**Table S1.** Relative abundance of identified bacterial communities' diversity in Forcha at the Phyla level.

| Phyla           | Relative abundance |
|-----------------|--------------------|
| Firmicutes      | 98.882             |
| Proteobacteria  | 0.913              |
| Cyanobacteria   | 0.138              |
| Thermotogae     | 0.046              |
| Bacteroidetes   | 0.009              |
| Actinobacteria  | 0.004              |
| Tenericutes     | 0.003              |
| Chloroflexi     | 0.003              |
| Verrucomicrobia | 0.001              |
| Chrysiogenetes  | 0.001              |
| Armatimonadetes | 0.001              |

**Table S2.** Relative abundance of identified bacterial communities' diversity in fermented beverages at the genus level.

| Forcha           |                    | Champús       |                    | Chicha        |                    | Masato        |                    |
|------------------|--------------------|---------------|--------------------|---------------|--------------------|---------------|--------------------|
| Genera           | Relative abundance | Genera        | Relative abundance | Genera        | Relative abundance | Genera        | Relative abundance |
| Lactobacillus    | 81.900             | Weissella     | 68.147             | Lactobacillus | 89.459             | Lactobacillus | 70.000             |
| Oenococcus       | 16.929             | Lactococcus   | 29.400             | Weissella     | 8.359              | Acetobacter   | 29.583             |
| Zymomonas        | 0.375              | Acetobacter   | 0.605              | Acetobacter   | 1.467              | Zymomonas     | 0.417              |
| Acetobacter      | 0.303              | Leuconostoc   | 0.571              | Oenococcus    | 0.513              |               |                    |
| Rickettsia       | 0.205              | Bacillus      | 0.445              | Leuconostoc   | 0.165              |               |                    |
| No identified    | 0.122              | Lactobacillus | 0.365              | Granulibacter | 0.018              |               |                    |
| Leuconostoc      | 0.049              | Burkholderia  | 0.251              | Lactococcus   | 0.018              |               |                    |
| Pediococcus      | 0.027              | Gluconobacter | 0.148              |               |                    |               |                    |
| Tetragenococcus  | 0.013              | Klebsiella    | 0.034              |               |                    |               |                    |
| Weissella        | 0.011              | Acinetobacter | 0.011              |               |                    |               |                    |
| Komagataeibacter | 0.008              | Cronobacter   | 0.011              |               |                    |               |                    |

|                  |       |                       |       |
|------------------|-------|-----------------------|-------|
| Streptococcus    | 0.005 | Komagataeibac-<br>ter | 0.011 |
| Lactococcus      | 0.004 |                       |       |
| Alteromonas      | 0.003 |                       |       |
| Brevibacillus    | 0.003 |                       |       |
| Bacteroides      | 0.003 |                       |       |
| Roseiflexus      | 0.003 |                       |       |
| Pseudomonas      | 0.002 |                       |       |
| Pseudopedobacter | 0.002 |                       |       |
| Acinetobacter    | 0.002 |                       |       |
| Orientia         | 0.002 |                       |       |
| Caulobacter      | 0.002 |                       |       |
| Bacillus         | 0.002 |                       |       |
| Mycoplasma       | 0.002 |                       |       |
| Salmonella       | 0.001 |                       |       |
| Haemophilus      | 0.001 |                       |       |
| Amphibacillus    | 0.001 |                       |       |
| Geobacillus      | 0.001 |                       |       |
| Lysinibacillus   | 0.001 |                       |       |
| Paenibacillus    | 0.001 |                       |       |
| Aerococcus       | 0.001 |                       |       |
| Carnobacterium   | 0.001 |                       |       |
| Haloferox        | 0.001 |                       |       |
| Halothermothrix  | 0.001 |                       |       |
| Coralimargarita  | 0.001 |                       |       |
| Tannerella       | 0.001 |                       |       |
| Micrococcus      | 0.001 |                       |       |
| Ureaplasma       | 0.001 |                       |       |
| Buchnera         | 0.001 |                       |       |
| Pantoea          | 0.001 |                       |       |
| Acidiphilium     | 0.001 |                       |       |
| Granulibacter    | 0.001 |                       |       |
| Octadecabacter   | 0.001 |                       |       |
| Methylovorus     | 0.001 |                       |       |
| Bdellovibrio     | 0.001 |                       |       |

|                    |       |
|--------------------|-------|
| Staphylococcus     | 0.001 |
| Thermobacillus     | 0.001 |
| Enterococcus       | 0.001 |
| Clostridium        | 0.001 |
| Lachnoclostridium  | 0.001 |
| Peptoclostridium   | 0.001 |
| Oscillibacter      | 0.001 |
| Erysipelothrix     | 0.001 |
| Chthonomonas       | 0.001 |
| Parabacteroides    | 0.001 |
| Prevotella         | 0.001 |
| Desulfurispirillum | 0.001 |
| Bifidobacterium    | 0.001 |
| Corynebacterium    | 0.001 |
| Spiroplasma        | 0.001 |

**Table S3.** Relative abundance of identified bacterial communities' diversity in fermented beverages at the specie level.

| Forcha                                |                    | Champús                         |                    | Chicha                          |                    | Masato                           |                    |
|---------------------------------------|--------------------|---------------------------------|--------------------|---------------------------------|--------------------|----------------------------------|--------------------|
| Specie                                | Relative abundance | Specie                          | Relative abundance | Specie                          | Relative abundance | Specie                           | Relative abundance |
| <i>Lactobacillus sanfranciscensis</i> | 35.021             | <i>Lactobacillus fermentum</i>  | 74.517             | <i>Weissella koreensis</i>      | 68.632             | <i>Lactobacillus fermentum</i>   | 46.025             |
| <i>Oenococcus oeni</i>                | 29.153             | <i>Weissella koreensis</i>      | 12.955             | <i>Lactococcus lactis</i>       | 29.609             | <i>Acetobacter pasteurianus</i>  | 29.707             |
| <i>Lactobacillus reuteri</i>          | 16.315             | <i>Lactobacillus buchneri</i>   | 2.898              | <i>Acetobacter pasteurianus</i> | 0.609              | <i>Lactobacillus ruminis</i>     | 17.573             |
| <i>Lactobacillus buchneri</i>         | 11.431             | <i>Lactobacillus brevis</i>     | 2.642              | <i>Leuconostoc citreum</i>      | 0.494              | <i>Lactobacillus reuteri</i>     | 2.929              |
| <i>Lactobacillus fermentum</i>        | 1.696              | <i>Lactobacillus reuteri</i>    | 2.557              | <i>Lactobacillus fermentum</i>  | 0.345              | <i>Lactobacillus buchneri</i>    | 1.674              |
| <i>Lactobacillus rhamnosus</i>        | 1.535              | <i>Acetobacter pasteurianus</i> | 2.273              | <i>Gluconobacter oxydans</i>    | 0.149              | <i>Lactobacillus delbrueckii</i> | 0.837              |

|                                         |       |                                       |       |                                       |       |                                |       |
|-----------------------------------------|-------|---------------------------------------|-------|---------------------------------------|-------|--------------------------------|-------|
| <i>Lactobacillus brevis</i>             | 1.079 | <i>Oenococcus oeni</i>                | 0.795 | <i>Leuconostoc mesenteroides</i>      | 0.080 | <i>Zymomonas mobilis</i>       | 0.418 |
| <i>Lactobacillus casei</i>              | 0.794 | <i>Lactobacillus casei</i>            | 0.540 | <i>Klebsiella pneumoniae</i>          | 0.023 | <i>Lactobacillus plantarum</i> | 0.418 |
| <i>Zymomonas mobilis</i>                | 0.646 | <i>Lactobacillus sakei</i>            | 0.256 | <i>Lactobacillus plantarum</i>        | 0.023 | <i>Lactobacillus rhamnosus</i> | 0.418 |
| <i>Acetobacter pasteurianus</i>         | 0.523 | <i>Leuconostoc citreum</i>            | 0.199 | <i>Cronobacter sakazakii</i>          | 0.011 |                                |       |
| <i>Lactobacillus sakei</i>              | 0.403 | <i>Lactobacillus rhamnosus</i>        | 0.142 | <i>Komagataeibacter medellinensis</i> | 0.011 |                                |       |
| <i>Candidatus Rickettsia amblyommii</i> | 0.353 | <i>Lactobacillus ruminis</i>          | 0.085 | <i>Bacillus thuringiensis</i>         | 0.011 |                                |       |
| <i>Lactobacillus paracasei</i>          | 0.267 | <i>Leuconostoc mesenteroides</i>      | 0.057 |                                       |       |                                |       |
| <i>Lactobacillus plantarum</i>          | 0.246 | <i>Granulibacter bethesdensis</i>     | 0.028 |                                       |       |                                |       |
| <i>Lactobacillus ruminis</i>            | 0.138 | <i>Lactococcus lactis</i>             | 0.028 |                                       |       |                                |       |
| <i>Lactobacillus delbrueckii</i>        | 0.095 | <i>Lactobacillus sanfranciscensis</i> | 0.028 |                                       |       |                                |       |
| <i>Leuconostoc mesenteroides</i>        | 0.073 |                                       |       |                                       |       |                                |       |
| <i>Pediococcus clausenii</i>            | 0.043 |                                       |       |                                       |       |                                |       |
| <i>Lactobacillus helveticus</i>         | 0.029 |                                       |       |                                       |       |                                |       |
| <i>Tetragenococcus halophilus</i>       | 0.023 |                                       |       |                                       |       |                                |       |
| <i>Weissella koreensis</i>              | 0.019 |                                       |       |                                       |       |                                |       |
| <i>Lactobacillus salivarius</i>         | 0.017 |                                       |       |                                       |       |                                |       |
| <i>Lactobacillus kefiranofaciens</i>    | 0.017 |                                       |       |                                       |       |                                |       |
| <i>Lactobacillus acidophilus</i>        | 0.015 |                                       |       |                                       |       |                                |       |
| <i>Komagataeibacter medellinensis</i>   | 0.014 |                                       |       |                                       |       |                                |       |
| <i>Lactococcus lactis</i>               | 0.006 |                                       |       |                                       |       |                                |       |

|                                     |       |
|-------------------------------------|-------|
| <i>Alteromonas macleodii</i>        | 0.005 |
| <i>Brevibacillus</i>                | 0.005 |
| <i>Pseudomonas resinovorans</i>     | 0.004 |
| <i>Orientia tsutsugamushi</i>       | 0.003 |
| <i>Salmonella enterica</i>          | 0.002 |
| <i>Haemophilus parainfluenzae</i>   | 0.002 |
| <i>Amphibacillus xylanus</i>        | 0.002 |
| <i>Geobacillus thermoleovorans</i>  | 0.002 |
| <i>Lysinibacillus sphaericus</i>    | 0.002 |
| <i>Streptococcus thermophilus</i>   | 0.002 |
| <i>Leuconostoc gelidum</i>          | 0.002 |
| <i>Aerococcus urinae</i>            | 0.002 |
| <i>Halothermothrix orenii</i>       | 0.002 |
| <i>Buchnera aphidicola</i>          | 0.001 |
| <i>Pantoea vagans</i>               | 0.001 |
| <i>Granulibacter bethesdensis</i>   | 0.001 |
| <i>Octadecabacter antarcticus</i>   | 0.001 |
| <i>Staphylococcus saprophyticus</i> | 0.001 |
| <i>Bacillus sp</i>                  | 0.001 |
| <i>Bacillus sp 1NLA3E</i>           | 0.001 |
| <i>Paenibacillus larvae</i>         | 0.001 |
| <i>Paenibacillus sp JDR-2</i>       | 0.001 |
| <i>Thermobacillus composti</i>      | 0.001 |
| <i>Streptococcus mutans</i>         | 0.001 |

|                                      |       |
|--------------------------------------|-------|
| <i>Streptococcus pneumoniae</i>      | 0.001 |
| <i>Enterococcus hirae</i>            | 0.001 |
| <i>Carnobacterium maltaromaticum</i> | 0.001 |
| <i>Peptoclostridium difficile</i>    | 0.001 |
| <i>Oscillibacter valericigenes</i>   | 0.001 |
| <i>Erysipelothrix rhusiopathiae</i>  | 0.001 |

**Table S4.** Relative abundance of identified fungal communities' diversity in fermented beverages at the genus level.

| Champús         |                    | Chicha          |                    | Masato        |                    | Forcha          |                    |
|-----------------|--------------------|-----------------|--------------------|---------------|--------------------|-----------------|--------------------|
| Genus           | Abundance relative | Genus           | Abundance relative | Genus         | Abundance relative | Genus           | Abundance relative |
| Hanseniaspora   | 66.481             | Saccharomyces   | 84.79              | Pichia        | 23.17              | Saccharomyces   | 77.6               |
| Saccharomyces   | 12.687             | Hanseniaspora   | 11.19              | Dekkera       | 19.82              | Dekkera         | 22.3               |
| Starmera        | 9.929              | Candida         | 1.18               | Candida       | 16.77              | Pichia          | 0.04               |
| Pichia          | 9.232              | Wicherhamomyces | 1.0                | Saccharomyces | 12.2               | Saccharomycodes | 0.01               |
| Schwanniomyces  | 0.522              | Pichia          | 0.9                | Meyerozyma    | 9.45               |                 |                    |
| Clavispora      | 0.315              | Kodamaea        | 0.9                | Clavispora    | 9.45               |                 |                    |
| Meyerozyma      | 0.233              | Meyerozyma      | 0.86               | Geotrichum    | 7.01               |                 |                    |
| Diutina         | 0.228              | Metschnikowia   | 0.08               | Cryptococcus  | 2.13               |                 |                    |
| Wicherhamomyces | 0.129              | Lodderomyces    | 0.02               |               |                    |                 |                    |
| Dipodascus      | 0.08               |                 |                    |               |                    |                 |                    |
| Candida         | 0.069              |                 |                    |               |                    |                 |                    |
| Kluyveromyces   | 0.046              |                 |                    |               |                    |                 |                    |
| Torulaspora     | 0.015              |                 |                    |               |                    |                 |                    |
| Saturnispora    | 0.013              |                 |                    |               |                    |                 |                    |
| Debaryomyces    | 0.013              |                 |                    |               |                    |                 |                    |
| Hyphopichia     | 0.006              |                 |                    |               |                    |                 |                    |
| Fusarium        | 0.003              |                 |                    |               |                    |                 |                    |

**Table S5.** Relative abundance of identified fungal communities' diversity in fermented beverages at the specie level.

| Champús                            |                    | Chicha                           |                    | Masato                           |                    | Forcha                          |                    |
|------------------------------------|--------------------|----------------------------------|--------------------|----------------------------------|--------------------|---------------------------------|--------------------|
| Specie                             | Abundance relative | Specie                           | Abundance relative | Specie                           | Abundance relative | Specie                          | Abundance relative |
| <i>Hanseniaspora nectarophila</i>  | 66.468             | <i>Saccharomyces cerevisiae</i>  | 84.79              | <i>Pichia kudriavzevii</i>       | 24.84              | <i>Saccharomyces cerevisiae</i> | 77.646             |
| <i>Saccharomyces cerevisiae</i>    | 12.687             | <i>Hanseniaspora uvarum</i>      | 10.20              | <i>Dekkera bruxellensis</i>      | 21.24              | <i>Dekkera bruxellensis</i>     | 22.311             |
| <i>Starmera stellimalicola</i>     | 9.929              | <i>Hanseniaspora opuntiae</i>    | 0.99               | <i>Saccharomyces cerevisiae</i>  | 13.07              | <i>Pichia kluyveri</i>          | 0.039              |
| <i>Pichia kudriavzevii</i>         | 5.006              | <i>Wickerhamomyces anomalus</i>  | 0.97               | <i>Candida famata</i>            | 10.78              | <i>Saccharomycodes ludwigii</i> | 0.003              |
| <i>Pichia kluyveri</i>             | 4.226              | <i>Kodamaea ohmeri</i>           | 0.92               | <i>Meyerozyma guilliermondii</i> | 10.13              |                                 |                    |
| <i>Schwanniomyces occidentalis</i> | 0.522              | <i>clavisporus lusitaniae</i>    | 0.60               | <i>Clavispora lusitaniae</i>     | 10.13              |                                 |                    |
| <i>Clavispora lusitaniae</i>       | 0.315              | <i>Meyerozyma guilliermondii</i> | 0.86               | <i>Geotrichum candidum</i>       | 7.52               |                                 |                    |
| <i>Meyerozyma guilliermondii</i>   | 0.233              | <i>Candida ethanolica</i>        | 0.55               | <i>Candida tropicalis</i>        | 7.19               |                                 |                    |
| <i>Diutina rugosa</i>              | 0.228              | <i>Metschnikowia koreensis</i>   | 0.08               | <i>Cryptococcus humicola</i>     | 2.29               |                                 |                    |
| <i>Wickerhamomyces anomalus</i>    | 0.103              | <i>Candida sergipensis</i>       | 0.03               |                                  |                    |                                 |                    |
| <i>Dipodascus australiensis</i>    | 0.080              | <i>Lodderomyces elongisporus</i> | 0.02               |                                  |                    |                                 |                    |
| <i>Candida sonorensis</i>          | 0.069              |                                  |                    |                                  |                    |                                 |                    |
| <i>Kluyveromyces marxianus</i>     | 0.046              |                                  |                    |                                  |                    |                                 |                    |
| <i>Wickerhamomyces pijperi</i>     | 0.026              |                                  |                    |                                  |                    |                                 |                    |
| <i>Torulaspora delbrueckii</i>     | 0.015              |                                  |                    |                                  |                    |                                 |                    |
| <i>Hanseniaspora hatyaiensis</i>   | 0.013              |                                  |                    |                                  |                    |                                 |                    |
| <i>Saturnispora diversa</i>        | 0.013              |                                  |                    |                                  |                    |                                 |                    |
| <i>Debaryomyces prosopidis</i>     | 0.013              |                                  |                    |                                  |                    |                                 |                    |
| <i>Hyphopichia burtonii</i>        | 0.006              |                                  |                    |                                  |                    |                                 |                    |
| <i>Fusarium oxysporum</i>          | 0.003              |                                  |                    |                                  |                    |                                 |                    |
